# Supplementary material for: Simultaneous shifts in stoichiometric and fatty acid compositionof Emiliania huxleyi in response to environmental changes
Source: Copernicus journal article supplement (doi:10.5194/bg-2017-162), 2017-05-19
Supplement: Supplementary file 1 [file bg-2017-162-supplement.pdf]

1 Table S1. Measured dissolved inorganic carbon (DIC) and total alkalinity (TA), and  
 2 calculated  $p\text{CO}_2$  (mean  $\pm$  SD) at the end of the experiments in the cultures of  
 3 *Emiliana huxleyi*. Outliers in the data of  $p\text{CO}_2$  were excluded in the table.

| Treatment |                    |          | DIC ( $\mu\text{mol kg}^{-1}$ ) | TA ( $\mu\text{mol kg}^{-1}$ ) | $p\text{CO}_2$ ( $\mu\text{atm}$ ) |
|-----------|--------------------|----------|---------------------------------|--------------------------------|------------------------------------|
| 12 °C     | Low $\text{CO}_2$  | N:P=10:1 | 1302 $\pm$ 93                   | 1269 $\pm$ 99                  | 1509 $\pm$ 61                      |
|           |                    | N:P=24:1 | 1328 $\pm$ 30                   | 1292 $\pm$ 47                  | 1564 $\pm$ 259                     |
|           |                    | N:P=63:1 | 1374 $\pm$ 43                   | 1349 $\pm$ 42                  | 1412 $\pm$ 36                      |
|           | High $\text{CO}_2$ | N:P=10:1 | 1956 $\pm$ 80                   | 1962 $\pm$ 86                  | 1357 $\pm$ 24                      |
|           |                    | N:P=24:1 | 2042 $\pm$ 29                   | 2053 $\pm$ 29                  | 1357 $\pm$ 132                     |
|           |                    | N:P=63:1 | 1829 $\pm$ 39                   | 1801 $\pm$ 84                  | 1041 $\pm$ 270                     |
| 18 °C     | Low $\text{CO}_2$  | N:P=10:1 | 763 $\pm$ 26                    | 793 $\pm$ 7                    | 552 $\pm$ 205                      |
|           |                    | N:P=24:1 | 885 $\pm$ 11                    | 922 $\pm$ 20                   | 567 $\pm$ 146                      |
|           |                    | N:P=63:1 | 1065 $\pm$ 5                    | 1108 $\pm$ 13                  | 633 $\pm$ 75                       |
|           | High $\text{CO}_2$ | N:P=10:1 | 1415 $\pm$ 267                  | 1454 $\pm$ 209                 | 1113 $\pm$ 848                     |
|           |                    | N:P=24:1 | 1278 $\pm$ 22                   | 1196 $\pm$ 31                  | 2944 $\pm$ 572                     |
|           |                    | N:P=63:1 | 1613 $\pm$ 61                   | 1620 $\pm$ 56                  | 1507 $\pm$ 574                     |
| 24 °C     | Low $\text{CO}_2$  | N:P=10:1 | 785 $\pm$ 22                    | 808 $\pm$ 18                   | 845 $\pm$ 443                      |
|           |                    | N:P=24:1 | 809 $\pm$ 18                    | 682 $\pm$ 20                   | -                                  |
|           |                    | N:P=63:1 | 1243 $\pm$ 27                   | 1231 $\pm$ 17                  | 1734 $\pm$ 281                     |
|           | High $\text{CO}_2$ | N:P=10:1 | 1266 $\pm$ 38                   | 1240 $\pm$ 34                  | 2079 $\pm$ 703                     |
|           |                    | N:P=24:1 | 1596 $\pm$ 89                   | 1691 $\pm$ 62                  | 1163 $\pm$ 269                     |
|           |                    | N:P=63:1 | 1616 $\pm$ 46                   | 1550 $\pm$ 59                  | 3295 $\pm$ 296                     |

4 Table S2. Results of Akaike information criterion corrected (AICc) in GLMMs for  
5 C:N:P stoichiometry, PIC and POC contents and their ratios, and fatty acid  
6 proportions and contents in response to temperature, N:P supply ratios and  $p\text{CO}_2$  in  
7 *Emiliana huxleyi*. The selected models are shown in bold. TFAs: total fatty acids;  
8 SFAs: saturated fatty acids; MUFAs: monounsaturated fatty acids; PUFAs:  
9 polyunsaturated fatty acids; DHA: docosahexaenoic acid (22:6n-3).

| Response variable                                      | Effect builder              | AICc            |
|--------------------------------------------------------|-----------------------------|-----------------|
| N:C biomass ratio ( $\text{mol mol}^{-1}$ )            | Main, two way and three way | -149.224        |
|                                                        | Main, two way               | -182.347        |
|                                                        | <b>Main</b>                 | <b>-259.881</b> |
| P:C biomass ratio ( $\text{mmol mol}^{-1}$ )           | Main, two way and three way | 230.956         |
|                                                        | Main, two way               | 206.978         |
|                                                        | <b>Main</b>                 | <b>155.039</b>  |
| N:P biomass ratio ( $\text{mol mol}^{-1}$ )            | Main, two way and three way | 362.508         |
|                                                        | Main, two way               | 359.671         |
|                                                        | <b>Main</b>                 | <b>356.018</b>  |
| PIC ( $\text{pg cell}^{-1}$ )                          | Main, two way and three way | 285.804         |
|                                                        | <b>Main, two way</b>        | <b>284.025</b>  |
|                                                        | Main                        | 299.364         |
| PIC ( $\mu\text{g ml}^{-1}$ )                          | Main, two way and three way | 300.200         |
|                                                        | Main, two way               | 276.029         |
|                                                        | <b>Main</b>                 | <b>231.545</b>  |
| PIC production ( $\text{pg cell}^{-1} \text{d}^{-1}$ ) | Main, two way and three way | 92.222          |
|                                                        | Main, two way               | 64.188          |
|                                                        | <b>Main</b>                 | <b>9.065</b>    |
| POC ( $\text{pg cell}^{-1}$ )                          | Main, two way and three way | 336.081         |

|                                                        |                             |                |
|--------------------------------------------------------|-----------------------------|----------------|
|                                                        | <b>Main, two way</b>        | <b>333.586</b> |
|                                                        | Main                        | 339.852        |
| POC ( $\mu\text{g ml}^{-1}$ )                          | Main, two way and three way | 304.408        |
|                                                        | Main, two way               | 280.234        |
|                                                        | <b>Main</b>                 | <b>235.488</b> |
| POC production ( $\text{pg cell}^{-1} \text{d}^{-1}$ ) | Main, two way and three way | 88.022         |
|                                                        | Main, two way               | 59.365         |
|                                                        | <b>Main</b>                 | <b>5.219</b>   |
| PIC/POC                                                | Main, two way and three way | 56.147         |
|                                                        | Main, two way               | 26.690         |
|                                                        | <b>Main</b>                 | <b>-36.148</b> |
| SFA proportion (% of TFAs)                             | Main, two way and three way | 304.845        |
|                                                        | <b>Main, two way</b>        | <b>302.115</b> |
|                                                        | Main                        | 304.984        |
| MUFA proportion (% of TFAs)                            | Main, two way and three way | 300.697        |
|                                                        | Main, two way               | 278.543        |
|                                                        | <b>Main</b>                 | <b>264.319</b> |
| PUFA proportion (% of TFAs)                            | Main, two way and three way | 359.132        |
|                                                        | Main, two way               | 336.555        |
|                                                        | <b>Main</b>                 | <b>318.057</b> |
| DHA proportion (% of TFAs)                             | Main, two way and three way | 304.197        |
|                                                        | <b>Main, two way</b>        | <b>301.625</b> |
|                                                        | Main                        | 310.200        |
| TFA content ( $\mu\text{g mg}^{-1} \text{C}^{-1}$ )    | Main, two way and three way | 554.949        |
|                                                        | Main, two way               | 536.499        |
|                                                        | <b>Main</b>                 | <b>512.664</b> |
| SFA content ( $\mu\text{g mg}^{-1} \text{C}^{-1}$ )    | Main, two way and three way | 437.382        |
|                                                        | Main, two way               | 416.262        |

|                                                      |                             |                |
|------------------------------------------------------|-----------------------------|----------------|
|                                                      | <b>Main</b>                 | <b>393.592</b> |
| MUFA content ( $\mu\text{g mg}^{-1} \text{C}^{-1}$ ) | Main, two way and three way | 421.162        |
|                                                      | Main, two way               | 400.009        |
|                                                      | <b>Main</b>                 | <b>374.298</b> |
| PUFA content ( $\mu\text{g mg}^{-1} \text{C}^{-1}$ ) | Main, two way and three way | 485.817        |
|                                                      | Main, two way               | 465.876        |
|                                                      | <b>Main</b>                 | <b>432.787</b> |
| DHA content ( $\mu\text{g mg}^{-1} \text{C}^{-1}$ )  | Main, two way and three way | 449.256        |
|                                                      | Main, two way               | 428.583        |
|                                                      | <b>Main</b>                 | <b>391.542</b> |

---

10  
11  
12  
13  
14  
15  
16  
17  
18  
19  
20  
21  
22  
23  
24  
25  
26  
27  
28  
29  
30  
31  
32  
33  
34  
35  
36

37 Table S3. The nature (synergism or antagonism) and magnitude (the difference  
 38 between observed combined effect and predicted additive effect) of the observed  
 39 interactive effects of warming, N and P deficiency (-N and -P), and enhanced  $p\text{CO}_2$   
 40 ( $\text{HCO}_2$ ) on PIC and POC cellular contents, saturated fatty acid proportion (SFA  
 41 proportion), and docosahexaenoic acid (DHA) proportion in *Emiliana huxleyi*.

| Variable                      | Treatment                       | Interaction |                    | <i>n</i> |
|-------------------------------|---------------------------------|-------------|--------------------|----------|
|                               |                                 | Nature      | Magnitude $\pm$ SE |          |
| PIC ( $\text{pg cell}^{-1}$ ) | Warming $\times$ -N             | Antagonism  | $-2.010 \pm 0.524$ | 12       |
|                               | Warming $\times$ -P             | Synergism   | $9.511 \pm 2.264$  | 12       |
|                               | Warming $\times$ $\text{HCO}_2$ | Synergism   | $17.640 \pm 1.495$ | 18       |
| POC ( $\text{pg cell}^{-1}$ ) | Warming $\times$ -N             | Synergism   | $19.056 \pm 0.392$ | 12       |
|                               | Warming $\times$ -P             | Synergism   | $39.644 \pm 2.854$ | 12       |
| SFA proportion (% of TFAs)    | -N $\times$ $\text{HCO}_2$      | Synergism   | $28.746 \pm 1.070$ | 9        |
|                               | -P $\times$ $\text{HCO}_2$      | Synergism   | $24.096 \pm 0.840$ | 9        |
| DHA proportion (% of TFAs)    | Warming $\times$ -N             | Synergism   | $4.622 \pm 0.873$  | 12       |
|                               | Warming $\times$ -P             | Synergism   | $4.316 \pm 0.671$  | 12       |
|                               | Warming $\times$ $\text{HCO}_2$ | Synergism   | $5.013 \pm 0.912$  | 18       |



43 Table S4. Fatty acid profiles of *Emiliana huxleyi* under three temperature (12, 18 and 24 °C), three N:P supply ratios (10:1, 24:1 and 63:1 mol  
 44 mol<sup>-1</sup>) and two pCO<sub>2</sub> levels (560 and 2400 µatm). Data are expressed as fatty acid contents (mean ± SD) (µg · mg C<sup>-1</sup>) and percentages of total  
 45 fatty acids (% of TFAs). SFAs, saturated fatty acids; MUFAs, monounsaturated fatty acids; PUFAs, polyunsaturated fatty acids; TFAs, total fatty  
 46 acids.

|         | 12 °C                |       |          |       |          |       |                       |       |          |       |          |       |
|---------|----------------------|-------|----------|-------|----------|-------|-----------------------|-------|----------|-------|----------|-------|
|         | Low pCO <sub>2</sub> |       |          |       |          |       | High pCO <sub>2</sub> |       |          |       |          |       |
|         | N:P=10:1             |       | N:P=24:1 |       | N:P=63:1 |       | N:P=10:1              |       | N:P=24:1 |       | N:P=63:1 |       |
|         | Content              | %     | Content  | %     | Content  | %     | Content               | %     | Content  | %     | Content  | %     |
| 14:0    | 31 ±1                | 19 ±2 | 26 ±7    | 20 ±1 | 23 ±5    | 16 ±2 | 22 ±1                 | 17 ±2 | 24 ±2    | 20 ±3 | 12 ±0    | 15 ±0 |
| 16:0    | 11 ±1                | 7 ±0  | 10 ±3    | 7 ±0  | 9 ±3     | 6 ±1  | 11 ±3                 | 8 ±1  | 9 ±3     | 8 ±1  | 4 ±0     | 5 ±0  |
| 16:1n-7 | 1 ±0                 | 1 ±0  | 1 ±0     | 1 ±0  | 2 ±0     | 1 ±0  | 1 ±0                  | 1 ±0  | 1 ±0     | 1 ±0  | 1 ±0     | 1 ±0  |
| 18:0    | 3 ±0.1               | 2 ±0  | 4 ±2     | 3 ±0  | 6 ±3     | 4 ±1  | 6 ±4                  | 4 ±2  | 4 ±3     | 3 ±2  | 2 ±0     | 2 ±0  |
| 18:1n-9 | 33 ±1                | 20 ±0 | 27 ±7    | 20 ±1 | 25 ±5    | 17 ±2 | 23 ±2                 | 18 ±1 | 22 ±4    | 19 ±1 | 11 ±0    | 13 ±0 |
| 18:1n-7 | 6 ±0                 | 3 ±0  | 5 ±1     | 4 ±0  | 7 ±1     | 5 ±0  | 5 ±0                  | 4 ±0  | 5 ±1     | 4 ±0  | 4 ±0     | 4 ±0  |
| 18:2n-6 | 9 ±1                 | 5 ±0  | 7 ±2     | 6 ±0  | 5 ±1     | 4 ±0  | 5 ±1                  | 4 ±0  | 5 ±1     | 5 ±0  | 2 ±0     | 3 ±0  |
| 18:3n-6 | 0 ±0                 | 0 ±0  | 0 ±0     | 0 ±0  | 0.1 ±0   | 0 ±0  | 0 ±0                  | 0 ±0  | 0 ±0     | 0 ±0  | 0 ±0     | 0 ±0  |
| 18:3n-3 | 11 ±1                | 7 ±0  | 8 ±2     | 6 ±0  | 10 ±3    | 7 ±0  | 9 ±1                  | 7 ±0  | 7 ±1     | 6 ±1  | 6 ±0     | 7 ±0  |
| 18:4n-3 | 7 ±1                 | 4 ±0  | 5 ±2     | 4 ±0  | 6 ±2     | 4 ±0  | 6 ±1                  | 4 ±0  | 5 ±1     | 4 ±0  | 4 ±0.3   | 5 ±0  |
| 20:2n-6 | 0 ±0                 | 0 ±0  | 0 ±0     | 0 ±0  | 1 ±0     | 1 ±0  | 0 ±0                  | 0 ±0  | 0 ±0     | 0 ±0  | 0 ±0     | 1 ±0  |
| 20:3n-6 | 0.4 ±0               | 0 ±0  | 0.6 ±0   | 0 ±0  | 1 ±0     | 1 ±0  | 0 ±0                  | 0 ±0  | 1 ±1     | 1 ±1  | 0 ±0     | 0 ±0  |
| 22:0    | 1 ±0                 | 1 ±0  | 1 ±1     | 1 ±0  | 2 ±0     | 1 ±0  | 1 ±0                  | 1 ±0  | 1 ±0     | 1 ±0  | 0 ±0     | 1 ±0  |

|                     |         |        |          |        |          |        |          |        |          |        |          |        |
|---------------------|---------|--------|----------|--------|----------|--------|----------|--------|----------|--------|----------|--------|
| 20:5n-3             | 2 ± 0   | 1 ± 0  | 1 ± 0    | 1 ± 0  | 2 ± 1    | 1 ± 0  | 1 ± 1    | 1 ± 0  | 1 ± 1    | 1 ± 0  | 1 ± 0    | 1 ± 0  |
| 23:0                | 0 ± 0   | 0 ± 0  | 0 ± 0    | 0 ± 0  | 0 ± 0    | 0 ± 0  | 1 ± 1    | 1 ± 1  | 0 ± 0    | 0 ± 0  | 0 ± 0    | 0 ± 0  |
| 24:0                | 1 ± 0   | 0 ± 0  | 0 ± 0    | 0 ± 0  | 1 ± 1    | 0 ± 0  | 1 ± 1    | 1 ± 0  | 0 ± 0    | 0 ± 0  | 0 ± 0    | 0 ± 0  |
| 22:5n-3, 24:1n-9    | 1 ± 0   | 1 ± 0  | 1 ± 0    | 1 ± 0  | 2 ± 1    | 1 ± 0  | 1 ± 0    | 1 ± 0  | 1 ± 0    | 1 ± 0  | 1 ± 0    | 1 ± 0  |
| 22:6n-3             | 29 ± 4  | 18 ± 1 | 23 ± 8   | 17 ± 1 | 33 ± 12  | 22 ± 3 | 26 ± 5   | 20 ± 1 | 20 ± 4   | 17 ± 1 | 22 ± 1   | 27 ± 1 |
| Unidentified        | 14 ± 2  | 9 ± 1  | 10 ± 3   | 7 ± 0  | 12 ± 5   | 8 ± 1  | 10 ± 2   | 7 ± 0  | 9 ± 1    | 7 ± 1  | 10 ± 1   | 12 ± 1 |
| ∑SFAs <sup>a</sup>  | 47 ± 0  | 29 ± 2 | 43 ± 12  | 32 ± 1 | 41 ± 10  | 28 ± 2 | 41 ± 8   | 32 ± 2 | 38 ± 8   | 32 ± 2 | 20 ± 1   | 24 ± 1 |
| ∑MUFAs <sup>b</sup> | 41 ± 2  | 26 ± 0 | 35 ± 9   | 26 ± 1 | 35 ± 7   | 25 ± 2 | 30 ± 3   | 23 ± 2 | 30 ± 7   | 25 ± 1 | 16 ± 0.3 | 20 ± 0 |
| ∑PUFAs <sup>c</sup> | 59 ± 6  | 37 ± 2 | 47 ± 15  | 35 ± 1 | 58 ± 19  | 39 ± 3 | 49 ± 8   | 38 ± 2 | 41 ± 9   | 35 ± 2 | 36 ± 2   | 44 ± 1 |
| ∑TFAs <sup>d</sup>  | 162 ± 9 |        | 134 ± 38 |        | 146 ± 42 |        | 130 ± 20 |        | 118 ± 25 |        | 82 ± 3   |        |

47 <sup>a</sup> also includes 20:0 present at < 0.5% of TFAs in all treatments. <sup>b</sup> also includes 14:1, 20:1n-9 and 22:1n-9 present at < 0.5% of TFAs in all  
48 treatments. <sup>c</sup> also includes 16:3n-4, 20:4n-6, 20:3n-3, 20:4n-3, 22:2n-6 present at < 0.5% of TFAs in all treatments. <sup>d</sup> also includes the  
49 unidentified FA component.

50  
51  
52  
53  
54  
55  
56  
57  
58  
59  
60  
61



62 Table S4. Continued.

|                  | 18 °C              |       |          |       |          |       |                     |       |          |       |          |       |
|------------------|--------------------|-------|----------|-------|----------|-------|---------------------|-------|----------|-------|----------|-------|
|                  | Low $p\text{CO}_2$ |       |          |       |          |       | High $p\text{CO}_2$ |       |          |       |          |       |
|                  | N:P=10:1           |       | N:P=24:1 |       | N:P=63:1 |       | N:P=10:1            |       | N:P=24:1 |       | N:P=63:1 |       |
|                  | Content            | %     | Content  | %     | Content  | %     | Content             | %     | Content  | %     | Content  | %     |
| 14:0             | 27 ±4              | 18 ±1 | 17 ±1    | 17 ±0 | 21 ±1    | 15 ±1 | 32 ±5               | 18 ±1 | 20 ±5    | 18 ±2 | 16 ±1    | 16 ±1 |
| 16:0             | 9 ±1               | 6 ±0  | 5 ±0     | 5 ±0  | 7 ±0     | 5 ±0  | 12 ±2               | 7 ±0  | 8 ±3     | 7 ±1  | 6 ±0     | 6 ±0  |
| 16:1n-7          | 1 ±0               | 1 ±0  | 1 ±0     | 1 ±0  | 1 ±0     | 1 ±0  | 1 ±0                | 1 ±0  | 1 ±0     | 1 ±0  | 1 ±0     | 1 ±0  |
| 18:0             | 2 ±0               | 2 ±0  | 1 ±0     | 1 ±0  | 2 ±0     | 2 ±0  | 3 ±0                | 2 ±0  | 3 ±2     | 3 ±1  | 2 ±1     | 2 ±1  |
| 18:1n-9          | 23 ±2              | 15 ±0 | 12 ±0    | 13 ±0 | 16 ±1    | 11 ±0 | 31 ±3               | 17 ±1 | 17 ±4    | 16 ±1 | 15 ±0    | 15 ±0 |
| 18:1n-7          | 6 ±0               | 4 ±0  | 3 ±0     | 3 ±0  | 6 ±0     | 4 ±0  | 6 ±0                | 4 ±0  | 4 ±1     | 4 ±0  | 4 ±0     | 4 ±0  |
| 18:2n-6          | 4 ±0               | 3 ±0  | 3 ±0     | 3 ±0  | 3 ±0     | 2 ±0  | 5 ±0                | 3 ±0  | 4 ±1     | 4 ±0  | 3 ±0     | 2 ±0  |
| 18:3n-6          | 0 ±0               | 0 ±0  | 0 ±0     | 0 ±0  | 0 ±0     | 0 ±0  | 0 ±0                | 0 ±0  | 0 ±0     | 0 ±0  | 0 ±0     | 0 ±0  |
| 18:3n-3          | 10 ±1              | 7 ±0  | 8 ±0     | 8 ±0  | 10 ±1    | 7 ±0  | 12 ±1               | 7 ±0  | 7 ±2     | 6 ±0  | 8 ±0     | 8 ±0  |
| 18:4n-3          | 10 ±1              | 7 ±0  | 8 ±0     | 8 ±0  | 10 ±0    | 7 ±0  | 10 ±1               | 6 ±0  | 7 ±3     | 6 ±1  | 6 ±0     | 6 ±0  |
| 20:2n-6          | 0 ±0               | 0 ±0  | 0 ±0     | 0 ±0  | 0 ±0     | 0 ±0  | 0 ±0                | 0 ±0  | 0 ±0     | 0 ±0  | 1 ±0     | 1 ±0  |
| 20:3n-6          | 0 ±0               | 0 ±0  | 0 ±0     | 0 ±0  | 1 ±0     | 0 ±0  | 0 ±0                | 0 ±0  | 1 ±1     | 1 ±0  | 0 ±0     | 0 ±0  |
| 22:0             | 1 ±0               | 1 ±0  | 1 ±0     | 1 ±0  | 1 ±0     | 1 ±0  | 1 ±0                | 1 ±0  | 1 ±0     | 1 ±0  | 1 ±0     | 1 ±0  |
| 20:5n-3          | 1 ±0               | 1 ±0  | 1 ±0     | 1 ±0  | 1 ±0     | 1 ±0  | 1 ±0                | 1 ±0  | 1 ±1     | 1 ±0  | 1 ±0     | 1 ±0  |
| 23:0             | 0 ±0               | 0 ±0  | 0 ±0     | 0 ±0  | 0 ±0     | 0 ±0  | 0 ±0                | 0 ±0  | 0 ±0     | 0 ±0  | 0 ±0     | 0 ±0  |
| 24:0             | 1 ±0               | 0 ±0  | 1 ±0     | 1 ±0  | 0 ±0     | 0 ±0  | 1 ±0                | 0 ±0  | 0 ±0     | 0 ±0  | 0 ±0     | 0 ±0  |
| 22:5n-3, 24:1n-9 | 1 ±0               | 1 ±0  | 1 ±0     | 1 ±0  | 1 ±0     | 1 ±0  | 2 ±0                | 1 ±0  | 1 ±0     | 1 ±0  | 1 ±0     | 1 ±0  |
| 22:6n-3          | 40 ±3              | 26 ±2 | 25 ±2    | 26 ±1 | 40 ±5    | 29 ±2 | 42 ±2               | 25 ±2 | 25 ±9    | 23 ±3 | 27 ±2    | 26 ±2 |
| Unidentified     | 13 ±1              | 9 ±1  | 11 ±0    | 11 ±0 | 16 ±1    | 12 ±0 | 13 ±1               | 8 ±0  | 9 ±3     | 8 ±1  | 10 ±1    | 10 ±1 |

|                             |         |       |       |       |        |       |         |       |         |       |        |       |
|-----------------------------|---------|-------|-------|-------|--------|-------|---------|-------|---------|-------|--------|-------|
| $\Sigma$ SFAs <sup>a</sup>  | 41 ±4   | 27 ±2 | 24 ±1 | 25 ±0 | 32 ±1  | 23 ±1 | 49 ±7   | 28 ±2 | 33 ±9   | 29 ±6 | 26 ±2  | 25 ±2 |
| $\Sigma$ MUFAs <sup>b</sup> | 32 ±2   | 21 ±0 | 17 ±1 | 18 ±0 | 25 ±1  | 18 ±0 | 40 ±4   | 23 ±1 | 24 ±6   | 22 ±2 | 22 ±0  | 22 ±0 |
| $\Sigma$ PUFAs <sup>c</sup> | 67 ±4   | 44 ±2 | 45 ±2 | 47 ±0 | 67 ±6  | 48 ±1 | 73 ±0   | 42 ±3 | 46 ±16  | 41 ±4 | 45 ±2  | 44 ±2 |
| $\Sigma$ TFAs <sup>d</sup>  | 153 ±10 |       | 97 ±5 |       | 140 ±9 |       | 176 ±11 |       | 112 ±34 |       | 103 ±1 |       |

63

64

65

66

67

68

69

70

71

72

73

74

75

76

77

78

79

80

81

82

83 Table S4. Continued.

|                  | 24 °C              |       |          |       |          |       |                     |       |          |       |          |       |
|------------------|--------------------|-------|----------|-------|----------|-------|---------------------|-------|----------|-------|----------|-------|
|                  | Low $p\text{CO}_2$ |       |          |       |          |       | High $p\text{CO}_2$ |       |          |       |          |       |
|                  | N:P=10:1           |       | N:P=24:1 |       | N:P=63:1 |       | N:P=10:1            |       | N:P=24:1 |       | N:P=63:1 |       |
|                  | Content            | %     | Content  | %     | Content  | %     | Content             | %     | Content  | %     | Content  | %     |
| 14:0             | 17 ±1              | 17 ±1 | 15 ±1    | 18 ±2 | 23 ±5    | 18 ±1 | 18 ±0               | 19 ±2 | 7 ±3     | 16 ±1 | 12 ±1    | 14 ±1 |
| 16:0             | 7 ±0               | 7 ±0  | 6 ±1     | 7 ±1  | 10 ±1    | 8 ±1  | 8 ±0                | 8 ±1  | 4 ±1     | 10 ±1 | 7 ±1     | 8 ±0  |
| 16:1n-7          | 1 ±0               | 1 ±0  | 1 ±0     | 1 ±0  | 1 ±0     | 1 ±0  | 1 ±0                | 1 ±0  | 1 ±0     | 1 ±0  | 1 ±0     | 1 ±0  |
| 18:0             | 2 ±0               | 2 ±0  | 2 ±1     | 3 ±1  | 4 ±2     | 3 ±2  | 2 ±1                | 2 ±1  | 3 ±0     | 7 ±3  | 3 ±2     | 4 ±1  |
| 18:1n-9          | 11 ±0              | 11 ±0 | 7 ±1     | 8 ±1  | 11 ±2    | 8 ±0  | 12 ±1               | 13 ±1 | 5 ±2     | 11 ±1 | 8 ±0     | 10 ±1 |
| 18:1n-7          | 4 ±0               | 3 ±0  | 3 ±0     | 3 ±0  | 8 ±1     | 7 ±1  | 4 ±0                | 4 ±0  | 2 ±1     | 5 ±0  | 7 ±0     | 8 ±0  |
| 18:2n-6          | 3 ±0               | 3 ±0  | 4 ±1     | 5 ±0  | 5 ±1     | 4 ±0  | 3 ±0                | 3 ±0  | 2 ±1     | 4 ±0  | 3 ±0     | 4 ±0  |
| 18:3n-6          | 0 ±0               | 0 ±0  | 1 ±0     | 1 ±0  | 1 ±0     | 0 ±0  | 0 ±0                | 0 ±0  | 1 ±0     | 2 ±2  | 0 ±0     | 0 ±0  |
| 18:3n-3          | 6 ±0               | 6 ±0  | 4 ±1     | 6 ±0  | 6 ±1     | 5 ±0  | 5 ±1                | 5 ±0  | 2 ±1     | 4 ±1  | 4 ±0     | 5 ±0  |
| 18:4n-3          | 10 ±1              | 10 ±1 | 10 ±2    | 12 ±1 | 11 ±2    | 9 ±0  | 8 ±1                | 9 ±1  | 4 ±2     | 8 ±1  | 7 ±1     | 8 ±1  |
| 20:2n-6          | 0 ±0               | 0 ±0  | 0 ±0     | 0 ±0  | 0 ±0     | 0 ±0  | 0 ±0                | 0 ±0  | 0 ±0     | 0 ±0  | 0 ±0     | 0 ±0  |
| 20:3n-6          | 0 ±0               | 0 ±0  | 1 ±1     | 1 ±1  | 1 ±0     | 1 ±0  | 0 ±0                | 0 ±0  | 0 ±0     | 0 ±0  | 0 ±0     | 0 ±0  |
| 22:0             | 1 ±0               | 1 ±0  | 0 ±0     | 1 ±0  | 1 ±0     | 1 ±0  | 1 ±0                | 1 ±0  | 1 ±0     | 2 ±2  | 1 ±0     | 1 ±0  |
| 20:5n-3          | 1 ±0               | 1 ±0  | 0 ±0     | 0 ±0  | 1 ±1     | 1 ±0  | 1 ±0                | 1 ±0  | 1 ±1     | 2 ±1  | 0 ±0     | 1 ±0  |
| 23:0             | 0 ±0               | 0 ±0  | 1 ±1     | 1 ±1  | 0 ±0     | 0 ±0  | 0 ±0                | 1 ±0  | 1 ±0     | 2 ±1  | 0 ±0     | 0 ±0  |
| 24:0             | 0 ±0               | 0 ±0  | 1 ±1     | 1 ±1  | 1 ±0     | 1 ±0  | 0 ±0                | 0 ±0  | 1 ±0     | 2 ±1  | 1 ±0     | 1 ±0  |
| 22:5n-3, 24:1n-9 | 1 ±0               | 1 ±0  | 0 ±0     | 1 ±0  | 1 ±0     | 1 ±0  | 1 ±0                | 1 ±0  | 0 ±0     | 0 ±0  | 1 ±0     | 1 ±0  |
| 22:6n-3          | 30 ±1              | 30 ±1 | 21 ±3    | 26 ±1 | 31 ±8    | 25 ±2 | 23 ±7               | 25 ±4 | 8 ±5     | 17 ±5 | 21 ±1    | 25 ±1 |
| Unidentified     | 6 ±0               | 6 ±0  | 4 ±0     | 5 ±0  | 9 ±2     | 7 ±0  | 5 ±1                | 5 ±1  | 2 ±1     | 4 ±1  | 6 ±1     | 7 ±0  |

|                             |        |       |        |       |         |       |        |       |        |       |       |       |
|-----------------------------|--------|-------|--------|-------|---------|-------|--------|-------|--------|-------|-------|-------|
| $\Sigma$ SFAs <sup>a</sup>  | 27 ±1  | 27 ±0 | 25 ±4  | 30 ±2 | 39 ±6   | 31 ±4 | 30 ±1  | 32 ±4 | 16 ±3  | 39 ±7 | 24 ±4 | 29 ±1 |
| $\Sigma$ MUFAs <sup>b</sup> | 16 ±0  | 16 ±0 | 11 ±1  | 13 ±1 | 21 ±4   | 17 ±1 | 17 ±1  | 19 ±1 | 8 ±4   | 18 ±2 | 17 ±1 | 21 ±1 |
| $\Sigma$ PUFAs <sup>c</sup> | 51 ±2  | 51 ±1 | 42 ±7  | 51 ±2 | 56 ±12  | 45 ±3 | 41 ±9  | 44 ±4 | 17 ±9  | 39 ±5 | 36 ±3 | 43 ±0 |
| $\Sigma$ TFA <sup>d</sup>   | 100 ±2 |       | 81 ±12 |       | 125 ±21 |       | 93 ±11 |       | 42 ±16 |       | 82 ±8 |       |

---

Table S5. Results of the selected GLMMs testing for the effects of temperature, N:P supply ratios and  $p\text{CO}_2$  on fatty acid contents in *Emiliana huxleyi*. Significant  $p$  values are shown in bold. T: temperature; N:P: N:P supply ratio; TFA: total fatty acid; SFA: saturated fatty acid; MUFA: monounsaturated fatty acid; PUFA: polyunsaturated fatty acid; DHA: docosaheptaenoic acid (22:6n-3).

| Variable                                             | Factor         | Coefficient $\pm$<br>SE | $t$    | $p$              |
|------------------------------------------------------|----------------|-------------------------|--------|------------------|
| TFA content ( $\mu\text{g mg}^{-1} \text{C}^{-1}$ )  | Intercept      | 202.099 $\pm$<br>17.745 | 11.389 | <0.001           |
|                                                      | T              | -3.444 $\pm$ 0.827      | -4.164 | <b>&lt;0.001</b> |
|                                                      | $p\text{CO}_2$ | -0.014 $\pm$ 0.004      | -3.038 | <b>0.004</b>     |
|                                                      | N:P            | -0.188 $\pm$ 0.182      | -1.033 | 0.307            |
| SFA content ( $\mu\text{g mg}^{-1} \text{C}^{-1}$ )  | Intercept      | 58.540 $\pm$ 5.265      | 11.119 | <0.001           |
|                                                      | T              | -0.978 $\pm$ 0.245      | -3.986 | <b>&lt;0.001</b> |
|                                                      | $p\text{CO}_2$ | -0.003 $\pm$ 0.001      | -2.240 | <b>0.030</b>     |
|                                                      | N:P            | -0.118 $\pm$ 0.054      | -2.182 | <b>0.034</b>     |
| MUFA content ( $\mu\text{g mg}^{-1} \text{C}^{-1}$ ) | Intercept      | 53.910 $\pm$ 4.324      | 12.468 | <0.001           |
|                                                      | T              | -1.361 $\pm$ 0.202      | -6.755 | <b>&lt;0.001</b> |
|                                                      | $p\text{CO}_2$ | -0.002 $\pm$ 0.001      | -1.882 | 0.066            |
|                                                      | N:P            | -0.074 $\pm$ 0.044      | -1.675 | 0.100            |
| PUFA content ( $\mu\text{g mg}^{-1} \text{C}^{-1}$ ) | Intercept      | 71.361 $\pm$ 7.854      | 9.086  | <0.001           |
|                                                      | T              | -0.664 $\pm$ 0.366      | -1.813 | 0.076            |
|                                                      | $p\text{CO}_2$ | -0.007 $\pm$ 0.002      | -3.626 | <b>0.001</b>     |
|                                                      | N:P            | -0.024 $\pm$ 0.081      | -0.292 | 0.772            |
| DHA content ( $\mu\text{g mg}^{-1} \text{C}^{-1}$ )  | Intercept      | 36.201 $\pm$ 5.156      | 7.021  | <0.001           |
|                                                      | T              | -0.248 $\pm$ 0.240      | -1.031 | 0.308            |
|                                                      | $p\text{CO}_2$ | -0.004 $\pm$ 0.001      | -3.034 | <b>0.004</b>     |
|                                                      | N:P            | 0.021 $\pm$ 0.053       | 0.392  | 0.697            |

Fig. S1

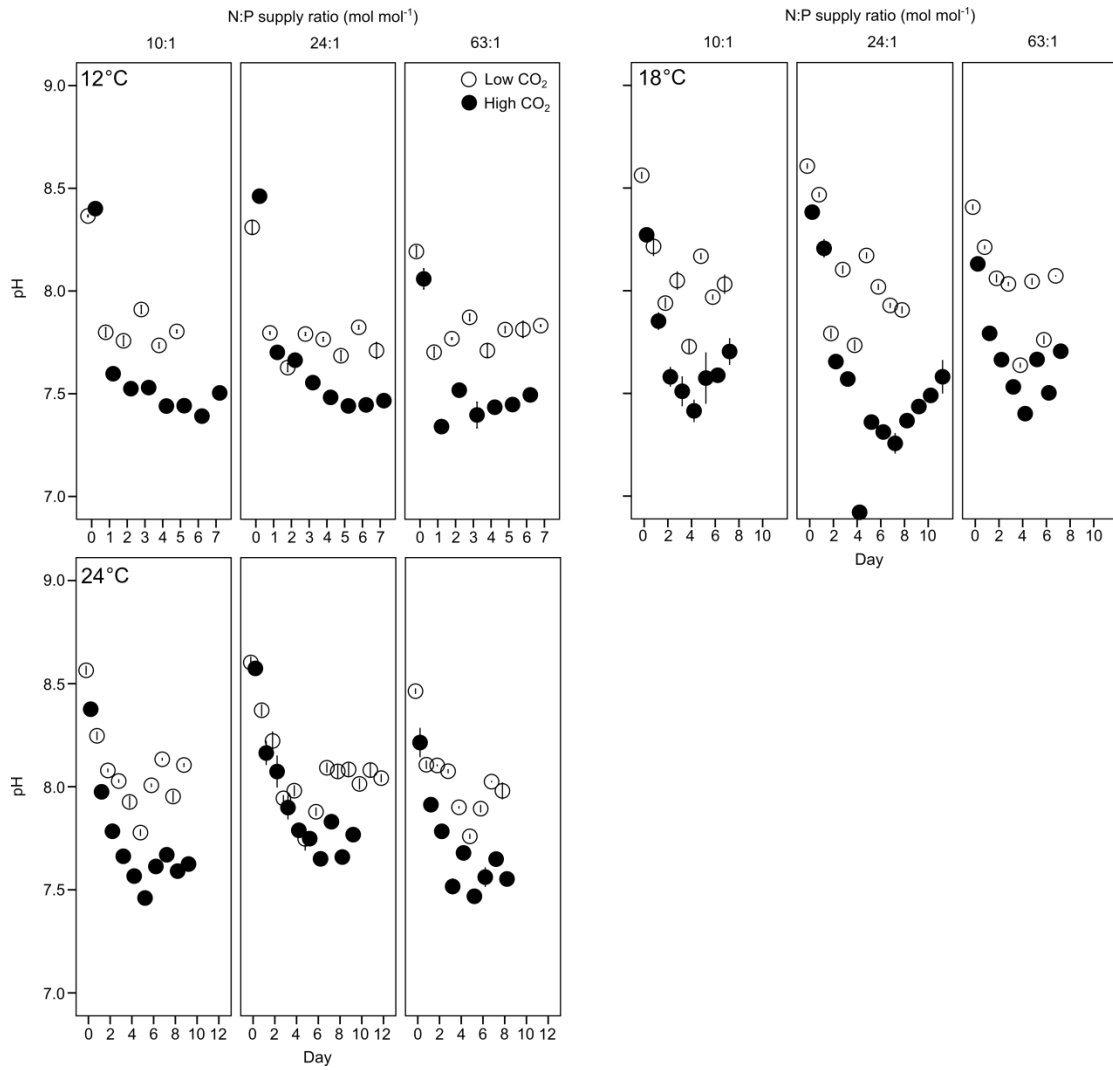

**Fig. S1** Time course of pH (mean  $\pm$  SE) under three temperature, three N:P supply ratios and two target  $p\text{CO}_2$  levels (low  $\text{CO}_2$ : 560  $\mu\text{atm}$ ; high  $\text{CO}_2$ : 2400 $\mu\text{atm}$ ) in the semi-continuous cultures of *E. huxleyi*.

Fig. S2

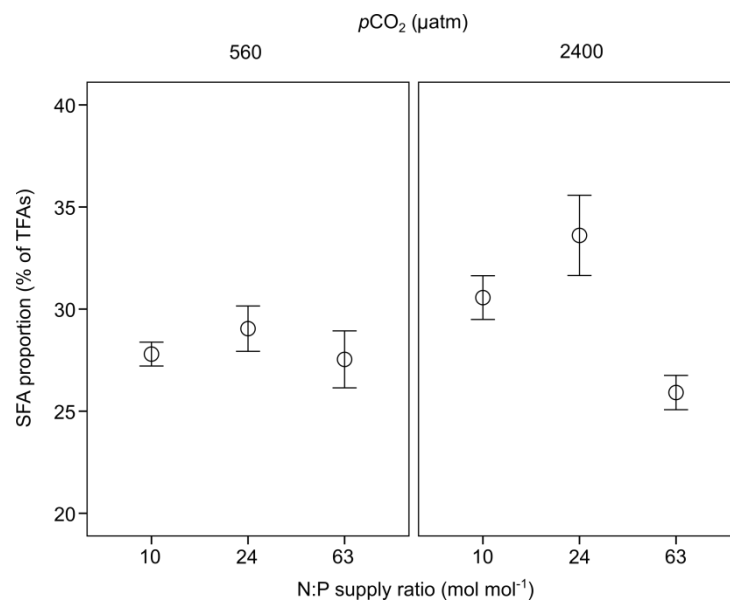

**Fig. S2** Responses of the proportion of saturated fatty acids (SFAs) to N:P supply ratios and  $p\text{CO}_2$  in *E. huxleyi*.
